# Supplementary material for: Molecular dynamics simulation on the displacement behaviour of crude oil by CO2/CH4 mixtures on a silica surface
Source: Royal Society of Chemistry journal article supplement (doi:10.1039/d3ra08610k), 2024-01-01
Supplement: d3ra08610k1.pdf [file d3ra08610k1.pdf]

Supplementary Information

Table S1. Density of CO<sub>2</sub> and CH<sub>4</sub> mixtures with different molar ratios at different temperatures and pressures

| Gas                                     | Condition    | Density |
|-----------------------------------------|--------------|---------|
| CO <sub>2</sub>                         | 323 K/15 MPa | 696.80  |
| 25% CH <sub>4</sub> +75%CO <sub>2</sub> | 323 K/15 MPa | 400.62  |
|                                         | 323 K/15 MPa | 260.33  |
| 50% CH <sub>4</sub> +50%CO <sub>2</sub> | 343 K/30 MPa | 386.14  |
|                                         | 363 K/45 MPa | 447.54  |
|                                         | 383 K/60 MPa | 482.53  |
| CH <sub>4</sub>                         | 323 K/15 MPa | 105.50  |

Tables S1 shows the densities of supercritical CO<sub>2</sub>/CH<sub>4</sub> mixtures at different mole ratios and the density of a 50% CH<sub>4</sub>+50% CO<sub>2</sub> mixture at different temperatures and pressures. The density of pure methane and CO<sub>2</sub> under the conditions of 323 K and 15 MPa is 701.08 kg/m<sup>3</sup> and 102.48 kg/m<sup>3</sup> respectively (according to NIST), which is very close to our calculated values. Additionally, the density of the supercritical CO<sub>2</sub>/CH<sub>4</sub> mixture calculated in our simulation is very similar to the density reported in the database by the Aimoli group [Aimoli et al., 2014]. This indicates that the system is in a critical state.

[1] C. G. Aimoli, E. J. Maginn and C. R. A. Abreu, *Journal of Chemical & Engineering Data*, 2014, 59, 3041-3054.
